# Supplementary material for: Long-term Rescue of Photoreceptors in a Rodent Model of Retinitis Pigmentosa Associated with MERTK Mutation
Source: PubMed Central journal article supplement (PMC6063887; doi:10.1038/s41598-018-29631-z), 2018-07-27
Supplement: 41598_2018_29631_MOESM1_ESM.pdf [file 41598_2018_29631_MOESM1_ESM.pdf]

## **Supplementary Information:**

### **Long-term Rescue of Photoreceptors in a Rodent Model of Retinitis Pigmentosa Associated with MERTK Mutation**

H. Lorach<sup>1\*,#</sup>, S. Kang<sup>1,2,3\*</sup>, R. Dalal<sup>2</sup>, M.B. Bhuckory<sup>1,2</sup>, Y. Quan<sup>2</sup>, D. Palanker<sup>1,2</sup>

<sup>1</sup>Hansen Experimental Physics Laboratory, Stanford University, CA, USA

<sup>2</sup>Department of Ophthalmology, Stanford University, CA, USA

<sup>3</sup>Department of Ophthalmology and Visual Science, College of Medicine, The Catholic  
University of Korea, Seoul, Republic of Korea

\* These authors contributed equally

# Correspondence to [henri.lorach@gmail.com](mailto:henri.lorach@gmail.com)

## Supplementary Materials

**Movie S1.** Surgical removal of subretinal debris. This video illustrates the surgical procedure in RCS rats.

### Supplementary Figure S1.

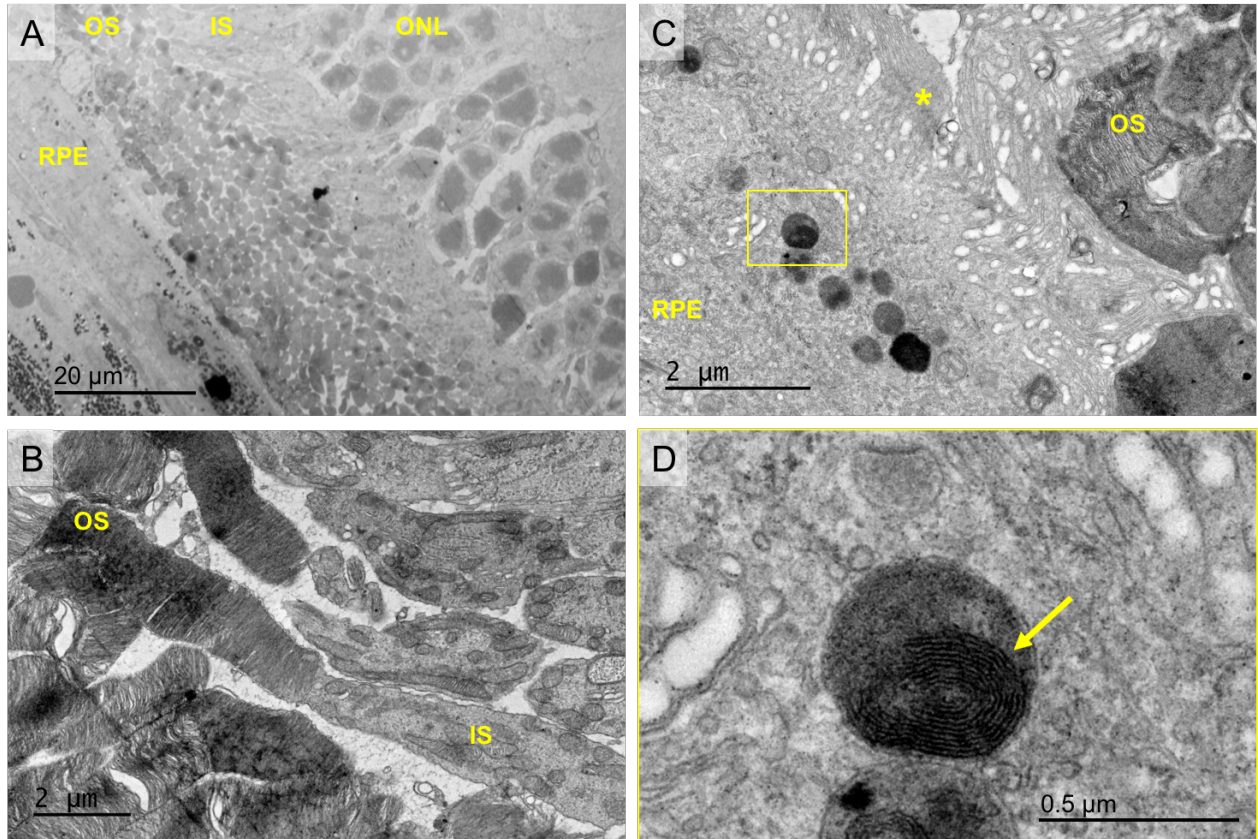

**Figure S1: Transmission Electron Microscopy of the surgically-treated area, at P180.** A) Overview of the outer retina in the treated zone. B) High magnification of the inner and outer segments revealing the regular disks structure in the outer segments. C) The OS/RPE interface with microvilli (\*) as well as phagosomes (within yellow square) containing phagocytized disks (D, arrow).

**Supplementary Figure S2.**

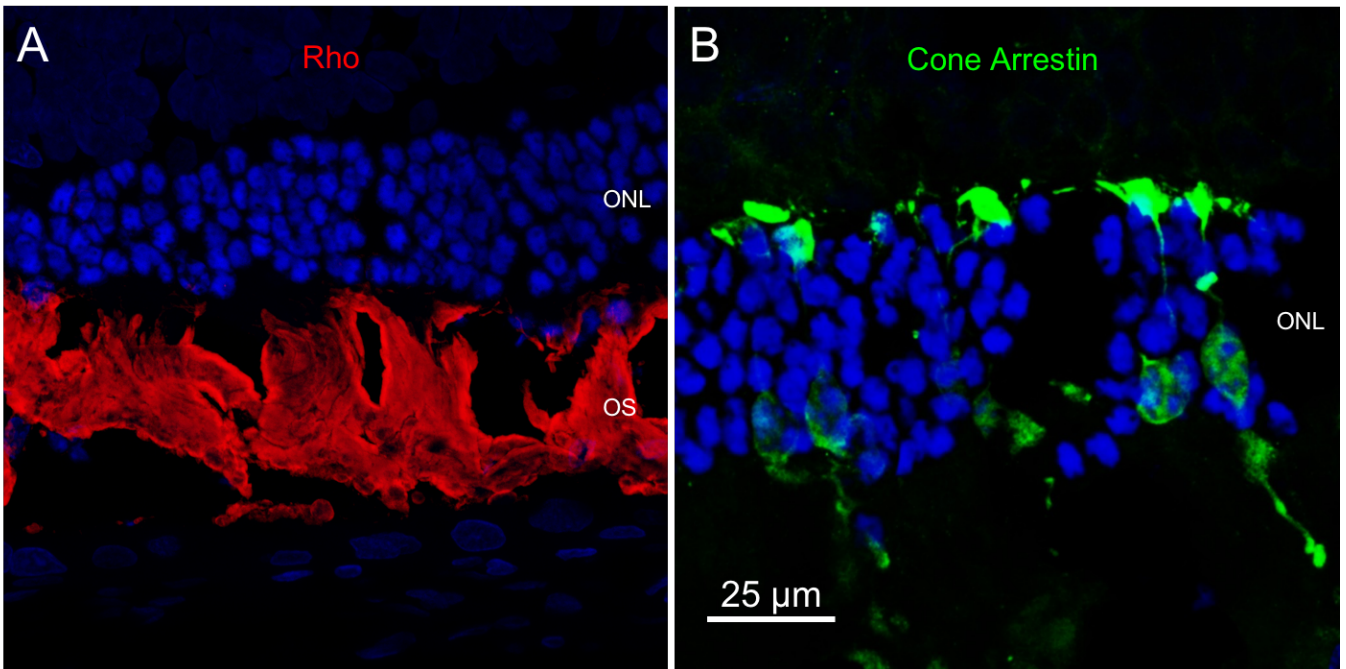

**Figure S2. Immunohistological analysis of the surgically treated retina at P360.** A) Rhodopsin expression in the outer segments confirms their functional state. (B) Cone arrestin staining shows preservation of cones among the rescued photoreceptors in the rod-dominated rat retina.

Supplementary Figure S3.

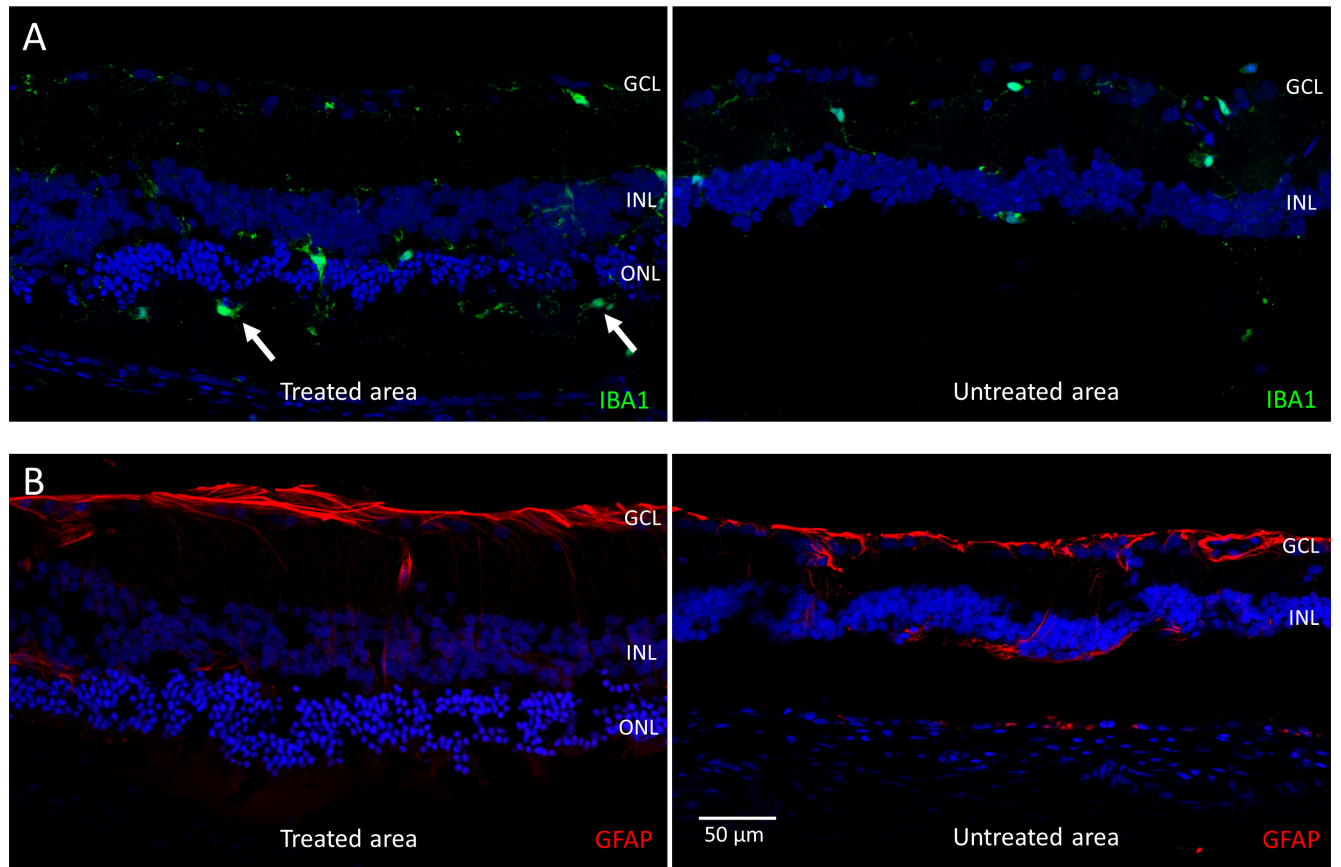

**Figure S3. Immunoreactivity of IBA1 (A) and GFAP (B) in the treated eye at P360.** Microglial cells (A) are present in the inner and outer retina, including the outer segments area (arrows). Muller cells are activated to a similar extent in treated and untreated areas (B).
